# Supplementary material
Source: PubMed Central journal article supplement (PMC2853776)
Supplement: NIHMS172805-supplement-Supp1.pdf [file NIHMS172805-supplement-Supp1.pdf]

## “Supplement Material”

### Materials and Methods

**Plasmids:** Sequences 1483 bp upstream and 83 bp downstream from the transcription initiation site of human *MTTP* gene were cloned into pGL2-Basic (Promega) between Hind III and Kpn I sites to generate pMTP-1483. A similar strategy was used to clone pMTP-1181 and pMTP-204. For pMTP-775, a Hind III-Bgl II DNA fragment was excised from pMTP-1483 and inserted into pGL2-Basic. All insert sequences were identical to the human genomic sequence AC083902. QuickChange site-directed mutagenesis (Stratagene) was performed in pMTP-204 to yield SREm, HNF1m, HNF4m, DR1m, and 2mut constructs harboring specific mutations in different *cis* elements. The primers (Table 1) used for cloning were designed using Primer 3.0. Plasmid expressing NrF1 (pMT2-NR2F1) was kindly provided by Dr. Sotirios Karathanasis.

**Cell cultures:** For differentiation, approximately  $3 \times 10^5$  Caco-2 cells were placed in Transwells (Corning) and cultured in DMEM supplemented with 20% FBS <sup>1</sup>. The media were changed every other day until day 16. Conditioned media and cell cultures were collected and kept at -70°C until analysis. ApoB was quantified using ELISA <sup>2, 3</sup>.

**Infection of cells with adenoviruses:** Caco-2 cells seeded at 30% confluence in 6-well plates. The next morning cells were washed once with DMEM containing 1%FBS and indicated MOI of adenovirus was added in 300 µl of DMEM containing 1%FBS. After 6 h incubation, 2 ml of DMEM supplemented with 10% FBS DMEM was added to each well and cells were allowed to grow overnight. Next day these infected Caco-2 cells were used for metabolic labeling or harvested for western blotting.

**Transfection with plasmid DNA or siRNA:** Cells in 12-well plates were 70% to 80% confluent on the day of transfection. Exgen 500 reagent (Fermentas) was used to deliver 500 ng of pMTP luciferase constructs with 20 ng of pCMV-RL (Promega) that expresses Renilla luciferase under the control of a cytomegalovirus promoter. After 48 h, cells were harvested for analyses. Variations in transfections were normalized to the expression of

Renilla luciferase. To stably transfect Caco-2 cells, we used 50 ng of pTRE2hyg (BD Bioscience) instead of pCMV-RL during transfection. After 2 days, cells were re-plated in 100-mm dishes and cultured in the presence of 300 µg/mL hygromycin. Colonies resistant to hygromycin were harvested after 2 weeks. Polyclonal cell lines were maintained in 100 µg/mL hygromycin. Lipofectamine 2000 reagent (Invitrogen) was employed to transfect 50 nM siRNA (Table 1) into Caco-2 cells at a ratio of 3.3 µl to 5 pmol siRNA. After overnight incubation, fresh media were added to dilute siRNA to 20 nM. Cells were collected for analysis after 2 days.

**Immunofluorescent Staining:** The cell staining procedure was described previously<sup>4</sup>. Tissue samples from C57BL/6J mice were fixed in 4% paraformaldehyde, frozen in Tissue-Tek OCT compounds (Fisher Scientific), sectioned onto Tissue Tack slides (Polyscience), and incubated with 0.05% Tween 20 in 10 mM sodium citrate buffer (pH 6.0) at 90°C for 25 min. Slides were incubated in a blocking buffer, PBS containing 1% horse serum, 3% BSA and 1% Triton X-100, for 30 min before 1 hr incubation with primary antibodies followed by another hour incubation with secondary antibodies. All antibodies were diluted 1 to 300 in the blocking buffer and the whole immunostaining was carried out at room temperature<sup>4</sup>, Images were obtained with a laser-scanning microscope (Model LSM 510, Carl Zeiss) and processed with Photoshop 6.0 before exporting to Illustrator CS2 (Adobe).

**Separation of mouse intestinal epithelial cells:** To isolate various intestinal cell types<sup>5</sup>, jejunum (about 16 cm from the end of the duodenum) was removed from anesthetized mice, emptied, and rinsed with saline containing 1 mM dithiothreitol (DTT). The lumen was filled with 3 mL of 1.5 mM KCl, 96 mM NaCl, 27 mM sodium citrate, 8 mM KH<sub>2</sub>PO<sub>4</sub>, 5.6 mM Na<sub>2</sub>HPO<sub>4</sub> buffer pH 7.3, and incubated with continuous agitation in a 37°C saline bath for 15 minutes. The lumen was emptied and refilled with 3 mL of 1 mM EDTA and 0.5 mM DTT in PBS and incubated in the saline bath for 4, 2, 2, 3, 4, 5, 7, 10 or 15 minutes to collect 9 fractions. Rinsing the lumen with 2 mL of saline between incubations increased the yield.

**RNA preparation and quantitative real-time PCR (qRT-PCR):** RNA from Caco-2 or mouse intestinal cells was used to synthesize cDNA. The quantitative PCR<sup>6</sup> was carried out with a SYBR Green I qPCR kit (Eurogenetic) using primers described in Table 1. Data were analyzed using the  $\Delta\Delta C_T$  method and are presented as fold change.

**Chromatin immunoprecipitation (ChIP):** ChIP was used to study the binding of transcription factors to the *MTTP* promoter<sup>7</sup>. Four 100-mm Transwell dishes (Corning) of 4-day Caco-2 cultures or 2 dishes of 14-day cultures were fixed with 1% formaldehyde. Isolated primary enterocytes were fixed with 1.5% formaldehyde. After 15 minutes at room temperature, cells were harvested. Nuclear fractions were isolated and sonicated (Sonic Dismembrator 550, 15 sec at setting 5, 16 bursts, 10-sec intervals). Approximately 25  $\mu$ g of cross-linked genomic DNA in 1 mL 1%BSA/PBS was incubated with 50  $\mu$ L of antibodies against NR2F1 (sc-6577), HNF-4 $\alpha$  (sc-8987) or HNF-1 $\alpha$  (sc-10791) overnight at 4°C. Next day 50  $\mu$ L of protein A/G beads (sc-2003) were added and centrifuged at 8,000 rpm for 5 min at room temperature. Precipitated DNA was extracted by phenol-chloroform after reversal of cross-linkage by incubating at 65°C for 4 h. Real-time and regular PCR were carried out using primers (Supplementary Table 1) for *MTTP*, *HNF4A*, or *APOB* promoters to determine the binding of different transcription factors. For controls, non-immune serum (sc-2028) was used.

Supplementary Table 1. Oligonucleotide sequences of primers and siRNAs

| <b>Primer pairs used for real-time RT-PCR</b>                   |                                          |                         |
|-----------------------------------------------------------------|------------------------------------------|-------------------------|
| <b>Gene ID</b>                                                  | <b>5' primer</b>                         | <b>3' primer</b>        |
| NR2F1                                                           | GCGGTTTCAGCGAGGAAGA                      | TGCGTACTGGCCTGGATTG     |
| NR2F2                                                           | ATCGCAACCAGTGCCAGTACT                    | ACCGCTTCCCGTCTCATG      |
| NR2F6                                                           | ACCGGAACCAGTGCCAGTAC                     | TGCACCGCCTCCTTCCT       |
| <b>Primer pairs used in ChIP experiments</b>                    |                                          |                         |
| <b>Promoter ID</b>                                              | <b>5' primer</b>                         | <b>3' primer</b>        |
| <b>APOB</b>                                                     | GAAGCCAGTGTAGAAAAGCAAACA                 | CAAGAGCGCCAGGATTGG      |
| <b>MTTP<sup>1</sup></b>                                         | CAGCCCACCTACGTTTAATCATT                  | CCAAACTCCAAAATCAGGACCTA |
| <b>MTTP<sup>2</sup></b>                                         | TGACCAGCAATCCTCAACTG                     | CCAAACTCCAAAATCAGGACCTA |
| <b>HNF4A<sup>3</sup></b>                                        | GGGTTCCCTAAGTGACTGGTT                    | ACCGCCCGTTATCTTATTG     |
| <b>mtp</b>                                                      | TAGCCCACCTGCGTTTAATCATT                  | CCAAACTCCAAAATCAGGACCTA |
| <b>Primers for cloning of WT or mutant <i>MTTP</i> promoter</b> |                                          |                         |
| <b>Primer ID</b>                                                |                                          |                         |
| ( <i>Hind III</i> ) +83                                         | CCCAAGCTTTGACCAGCAATCCTCAACTG            |                         |
| ( <i>Bgl II</i> ) -204                                          | GGAAGATCTGGTTTAGCTCTCAAAGTGAAA           |                         |
| ( <i>Kpn I</i> ) -1181                                          | CGGGGTACCGGTTTTGAGAGTGACCAG              |                         |
| ( <i>Kpn I</i> )-1483                                           | CGGGGTACCCAAAGCACTTTCACATTGC             |                         |
| Mut-SRE                                                         | GAGTGAGAGACTGAAAAGTGCgaattcCCTACGTTTAATC |                         |
| Mut-HNF1                                                        | CCCACCTACGTTgAATCATgAATAGTGAGCCC         |                         |
| Mut-HNF4                                                        | GGTCCTGATTTTGGAGTgcGGccgCTGACCTTTCCCAAAG |                         |
| Mut-DR1                                                         | GGAGTTTGGAGTCTGAtgTTTCCCAAAG             |                         |
| <b>Sequences of siRNA forward strands</b>                       |                                          |                         |
| <b>Gene ID</b>                                                  | <b>Target sequences</b>                  |                         |
| NR2F1                                                           | rCrCrGrCrGrAUrAUrGUUrArCUrGUrCUTT        |                         |
| NR2F2                                                           | rCrGrArGrArArCrAUUUrGrCrGrArArCUrGUU     |                         |
| NR2F6                                                           | UrGrArCUrCrArArGrGrCrCrArAUrArAUrAUU     |                         |
| GL2-luciferase                                                  | rCrGUrArCrGrCrGrGrArAUrArCUUrCrGrATT     |                         |

1. Primers for real-time PCR.
2. Primers for regular PCR.
3.  $\beta$  cell-specific P2 promoter, which is not accessible in intestinal cells.

## Reference List

- (1) Luchoomun J, Hussain MM. Assembly and secretion of chylomicrons by differentiated Caco-2 cells: Nascent triglycerides and preformed phospholipids are preferentially used for lipoprotein assembly. *J Biol Chem* 1999;274:19565-72.
- (2) Hussain MM, Zhao Y, Kancha RK, Blackhart BD, Yao Z. Characterization of recombinant human apoB-48-containing lipoproteins in rat hepatoma McA-RH7777 cells transfected with apoB48 cDNA: Overexpression of apoB-48 decreases synthesis of endogenous apoB-100. *Arterioscler Thromb Vasc Biol* 1995;15:485-94.
- (3) Bakillah A, Zhou Z, Luchoomun J, Hussain MM. Measurement of apolipoprotein B in various cell lines: correlation between intracellular levels and rates of secretion. *Lipids* 1997;32:1113-8.
- (4) Rava P, Ojakian GK, Shelness GS, Hussain MM. Phospholipid transfer activity of microsomal triacylglycerol transfer protein is sufficient for the assembly and secretion of apolipoprotein B lipoproteins. *J Biol Chem* 2006;281:11019-27.
- (5) Pinkus LM. Separation and use of enterocytes. *Methods Enzymol* 1981;77:154-62.
- (6) Iqbal J, Dai K, Seimon T, Jungreis R, Oyadomari M, Kuriakose G, Ron D, Tabas I, Hussain MM. IRE1 $\beta$  inhibits chylomicron production by selectively degrading MTP mRNA. *Cell Metab* 2008;7:445-55.
- (7) Sheng Z, Liang Y, Lin CY, Comai L, Chirico WJ. Direct regulation of rRNA transcription by fibroblast growth factor 2. *Mol Cell Biol* 2005 November;25:9419-26.
